# Supplementary material for: BIDIRECTIONAL PROSPECTIVE ASSOCIATIONS OF METABOLIC SYNDROME COMPONENTS WITH DEPRESSION, ANXIETY, AND ANTIDEPRESSANT USE
Source: PubMed Central journal article supplement — Depress Anxiety. 2016 Apr 27;33(8):754–64. doi: 10.1002/da.22512 (PMC5111740; doi:10.1002/da.22512), 2016-04-27
Supplement: DA-33-754-s001.pdf [file DA-33-754-s001.pdf]

**Table S1.** Associations of both psychopathology indicators and antidepressants with metabolic syndrome components across baseline, 2- and 6-year assessments.

| Predictor                             | Outcomes                                |        |          |        |        |          |                     |        |          |                 |        |          |                   |        |          |                         |        |          |             |  |  |
|---------------------------------------|-----------------------------------------|--------|----------|--------|--------|----------|---------------------|--------|----------|-----------------|--------|----------|-------------------|--------|----------|-------------------------|--------|----------|-------------|--|--|
|                                       | Number of metabolic syndrome components |        |          |        |        |          | Waist circumference |        |          | HDL cholesterol |        |          | Log Triglycerides |        |          | Systolic blood pressure |        |          | Log Glucose |  |  |
|                                       | B                                       | SE     | <i>p</i> | B      | SE     | <i>p</i> | B                   | SE     | <i>p</i> | B               | SE     | <i>p</i> | B                 | SE     | <i>p</i> | B                       | SE     | <i>p</i> |             |  |  |
| <b>Disorder category</b>              |                                         |        |          |        |        |          |                     |        |          |                 |        |          |                   |        |          |                         |        |          |             |  |  |
| <b>Time</b>                           | 0.0239                                  | 0.0027 | <.001    | 0.5854 | 0.0317 | <.001    | -0.0117             | 0.0011 | <.001    | 0.0025          | 0.0008 | .001     | 0.7843            | 0.0603 | <.001    | 0.0049                  | 0.0002 | <.001    |             |  |  |
| <b>Disorder</b>                       |                                         |        |          |        |        |          |                     |        |          |                 |        |          |                   |        |          |                         |        |          |             |  |  |
| <b>Healthy controls (reference)</b>   | -                                       | -      | -        | -      | -      | -        | -                   | -      | -        | -               | -      | -        | -                 | -      | -        | -                       | -      | -        |             |  |  |
| <b>Current disorder</b>               | -0.0211                                 | 0.0321 | .510     | 0.3546 | 0.4520 | .433     | 0.0192              | 0.0145 | .186     | -0.0038         | 0.0085 | .657     | -1.7853           | 0.6394 | .005     | 0.0030                  | 0.0023 | .197     |             |  |  |
| <b>Remitted disorder</b>              | -0.0118                                 | 0.0317 | .710     | 0.5510 | 0.4652 | .236     | -0.0063             | 0.0146 | .666     | 0.0019          | 0.0086 | .827     | -1.4108           | 0.6435 | .028     | 0.0039                  | 0.0022 | .081     |             |  |  |
| <b>Antidepressants</b>                |                                         |        |          |        |        |          |                     |        |          |                 |        |          |                   |        |          |                         |        |          |             |  |  |
| <b>No antidepressants (reference)</b> | -                                       | -      | -        | -      | -      | -        | -                   | -      | -        | -               | -      | -        | -                 | -      | -        | -                       | -      | -        |             |  |  |
| <b>TCA</b>                            | 0.2851                                  | 0.0428 | <.001    | 3.2636 | 0.7836 | <.001    | -0.0848             | 0.0250 | .001     | 0.0592          | 0.0178 | .001     | 2.0682            | 1.5447 | .181     | 0.0079                  | 0.0066 | .229     |             |  |  |
| <b>SSRI</b>                           | 0.0641                                  | 0.0284 | .024     | 1.3995 | 0.3606 | <.001    | -0.0120             | 0.0117 | .302     | 0.0213          | 0.0079 | .007     | -0.5284           | 0.5764 | .359     | -0.0005                 | 0.0023 | .845     |             |  |  |
| <b>Other antidepressants</b>          | 0.1164                                  | 0.0384 | .002     | 1.9445 | 0.5059 | <.001    | -0.0130             | 0.0184 | .481     | 0.0482          | 0.0125 | <.001    | 2.1987            | 1.0003 | .028     | 0.0004                  | 0.0030 | .884     |             |  |  |
| <b>IDS</b>                            |                                         |        |          |        |        |          |                     |        |          |                 |        |          |                   |        |          |                         |        |          |             |  |  |
| <b>Time</b>                           | 0.0250                                  | 0.0027 | <.001    | 0.6085 | 0.0312 | <.001    | -0.0119             | 0.0011 | <.001    | 0.0031          | 0.0007 | <.001    | 0.7523            | 0.0581 | <.001    | 0.0050                  | 0.0002 | <.001    |             |  |  |
| <b>IDS</b>                            | 0.0012                                  | 0.0008 | .158     | 0.0223 | 0.0110 | .043     | 0.0013              | 0.0004 | .001     | 0.0004          | 0.0002 | .077     | -0.0507           | 0.0173 | .003     | 0.0001                  | 0.0001 | .430     |             |  |  |
| <b>Antidepressants</b>                |                                         |        |          |        |        |          |                     |        |          |                 |        |          |                   |        |          |                         |        |          |             |  |  |
| <b>No antidepressants (reference)</b> | -                                       | -      | -        | -      | -      | -        | -                   | -      | -        | -               | -      | -        | -                 | -      | -        | -                       | -      | -        |             |  |  |
| <b>TCA</b>                            | 0.2726                                  | 0.0425 | <.001    | 3.1713 | 0.7867 | <.001    | -0.0866             | 0.0251 | .001     | 0.0553          | 0.0177 | .002     | 2.1144            | 1.5351 | .168     | 0.0079                  | 0.0065 | .228     |             |  |  |
| <b>SSRI</b>                           | 0.0529                                  | 0.0279 | .058     | 1.2958 | 0.3613 | <.001    | -0.0151             | 0.0116 | .193     | 0.0177          | 0.0079 | .024     | -0.5280           | 0.5790 | .362     | -0.0005                 | 0.0024 | .844     |             |  |  |
| <b>Other antidepressants</b>          | 0.1086                                  | 0.0380 | .004     | 1.9466 | 0.5060 | <.001    | -0.0161             | 0.0184 | .382     | 0.0437          | 0.0127 | .001     | 2.3080            | 0.9941 | .020     | 0.0006                  | 0.0031 | .832     |             |  |  |

|                                       |         |        |       |        |        |       |         |        |       |        |        |       |         |        |       |         |        |       |
|---------------------------------------|---------|--------|-------|--------|--------|-------|---------|--------|-------|--------|--------|-------|---------|--------|-------|---------|--------|-------|
| <b>BAI</b>                            |         |        |       |        |        |       |         |        |       |        |        |       |         |        |       |         |        |       |
| <b>Time</b>                           | 0.0251  | 0.0026 | <.001 | 0.6075 | 0.0306 | <.001 | -0.0125 | 0.0011 | <.001 | 0.0029 | 0.0007 | <.001 | 0.7819  | 0.0574 | <.001 | 0.0050  | 0.0002 | <.001 |
| <b>BAI</b>                            | 0.0028  | 0.0011 | .009  | 0.0356 | 0.0156 | .022  | 0.0005  | 0.0005 | .381  | 0.0007 | 0.0003 | .012  | -0.0167 | 0.0239 | .486  | 0.0003  | 0.0001 | .007  |
| <b>Antidepressants</b>                |         |        |       |        |        |       |         |        |       |        |        |       |         |        |       |         |        |       |
| <b>No antidepressants (reference)</b> | -       | -      | -     | -      | -      | -     | -       | -      | -     | -      | -      | -     | -       | -      | -     | -       | -      | -     |
| <b>TCA</b>                            | 0.2659  | 0.0420 | <.001 | 3.1177 | 0.7800 | <.001 | -0.0811 | 0.0249 | .001  | 0.0538 | 0.0176 | .002  | 1.8042  | 1.5407 | .242  | 0.0067  | 0.0064 | .295  |
| <b>SSRI</b>                           | 0.0500  | 0.0277 | .071  | 1.3321 | 0.3570 | <.001 | -0.0091 | 0.0116 | .432  | 0.0178 | 0.0078 | .022  | -0.7783 | 0.5756 | .176  | -0.0009 | 0.0023 | .697  |
| <b>Other antidepressants</b>          | 0.1026  | 0.0378 | .007  | 1.8730 | 0.5082 | <.001 | -0.0093 | 0.0185 | .615  | 0.0444 | 0.0125 | <.001 | 1.9320  | 0.9871 | .050  | -0.0001 | 0.0030 | .977  |
| <b>FQ</b>                             |         |        |       |        |        |       |         |        |       |        |        |       |         |        |       |         |        |       |
| <b>Time</b>                           | 0.0235  | 0.0027 | <.001 | 0.6037 | 0.0311 | <.001 | -0.0120 | 0.0011 | <.001 | 0.0026 | 0.0008 | .001  | 0.7796  | 0.0591 | <.001 | 0.0050  | 0.0002 | <.001 |
| <b>FQ</b>                             | -0.0004 | 0.0006 | .553  | 0.0079 | 0.0081 | .325  | 0.0007  | 0.0003 | .014  | 0.0000 | 0.0002 | .835  | -0.0162 | 0.0125 | .196  | 0.0001  | 0.0000 | .204  |
| <b>Antidepressants</b>                |         |        |       |        |        |       |         |        |       |        |        |       |         |        |       |         |        |       |
| <b>No antidepressants (reference)</b> | -       | -      | -     | -      | -      | -     | -       | -      | -     | -      | -      | -     | -       | -      | -     | -       | -      | -     |
| <b>TCA</b>                            | 0.2834  | 0.0425 | <.001 | 3.1820 | 0.7830 | <.001 | -0.0839 | 0.0248 | .001  | 0.0582 | 0.0177 | .001  | 1.8526  | 1.5405 | .229  | 0.0078  | 0.0066 | .233  |
| <b>SSRI</b>                           | 0.0621  | 0.0280 | .026  | 1.3542 | 0.3554 | <.001 | -0.0115 | 0.0116 | .323  | 0.0200 | 0.0078 | .011  | -0.7603 | 0.5753 | .186  | -0.0003 | 0.0023 | .887  |
| <b>Other antidepressants</b>          | 0.1082  | 0.0380 | .004  | 1.8353 | 0.5058 | <.001 | -0.0109 | 0.0185 | .555  | 0.0459 | 0.0126 | <.001 | 1.9256  | 0.9973 | .054  | 0.0004  | 0.0030 | .907  |

Notes:

1. Estimates were obtained from generalized estimating equations.
2. Analyses were adjusted for age, sex, education, smoking status, alcohol use, and physical activity.
3. Analyses were conducted with the maximum number of cases for each outcome. *N* ranges HDL: 6611-6633; SBP: 6849-6872; waist: 6824-6847; glucose: 6607-6629; triglycerides: 6614-6636; number of components: 6611-6633.
